# Supplementary material
Source: PubMed Central journal article supplement (PMC4930626)

Supplementary Figure - Uncropped scans with size marker indications

Extended Data Figure 9a

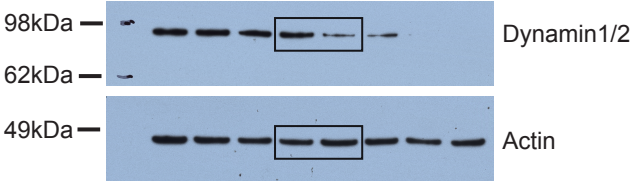

Supplement: NIHMS790105-supplement-supp_info.pdf [file NIHMS790105-supplement-supp_info.pdf]
